# Supplementary material for: Antitumor effect of WEE1 blockade as monotherapy or in combination with cisplatin in urothelial cancer
Source: PubMed Central journal article supplement — Cancer Sci. 2021 Jul 29;112(9):3669–81. doi: 10.1111/cas.15051 (PMC8409401; doi:10.1111/cas.15051), 2021-07-29
Supplement: CAS-112-3669-s002.pdf [file CAS-112-3669-s002.pdf]

## Supplementary Figure S1

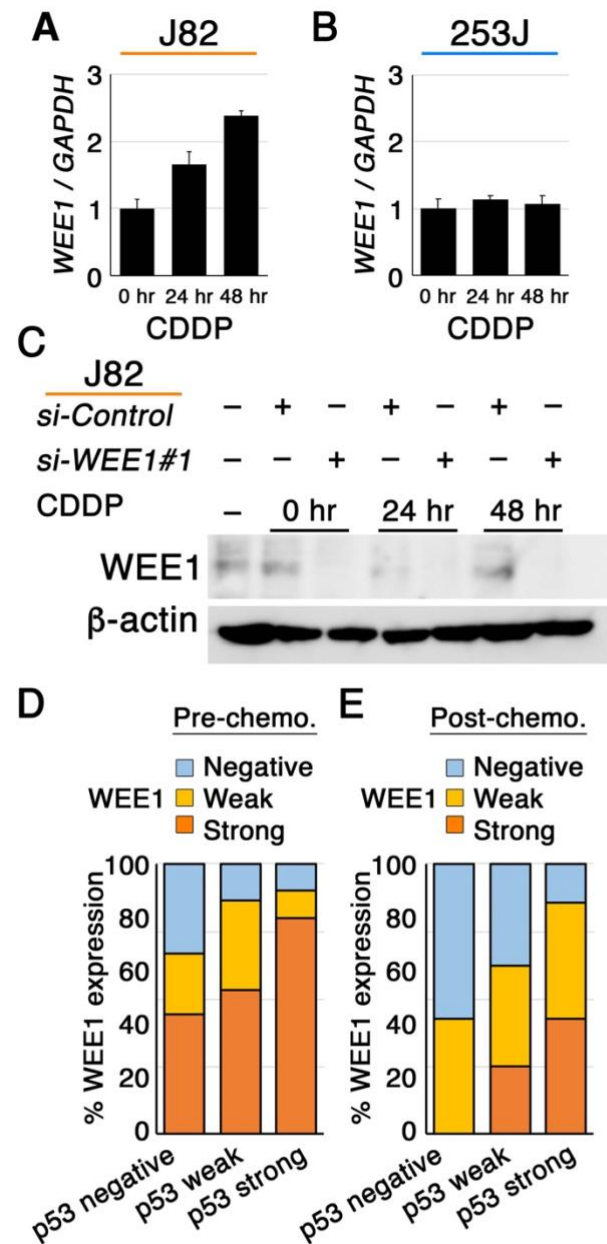

**A–B.** Expression levels of WEE1 mRNA were evaluated by quantitative RT-PCR in J82 (**A**) and 253J (**B**) cells. Cells were treated with 1  $\mu$ M CDDP and mRNA was extracted at indicated time points (0, 24 and 48 hrs). Values were normalized to GAPDH mRNA levels. **C.** Western blotting of WEE1 expression in J82 cells.  $\beta$ -actin served as the loading control. **D–E.** Distribution of WEE1 immunostaining in 34 preoperative (**D**) and 29 post-chemotherapy MIBC specimens (**E**), as shown in Figs. 1A and 1B and Supplementary Table S1, with regard to p53 immunostaining.

## Supplementary Figure S2

### CDDP

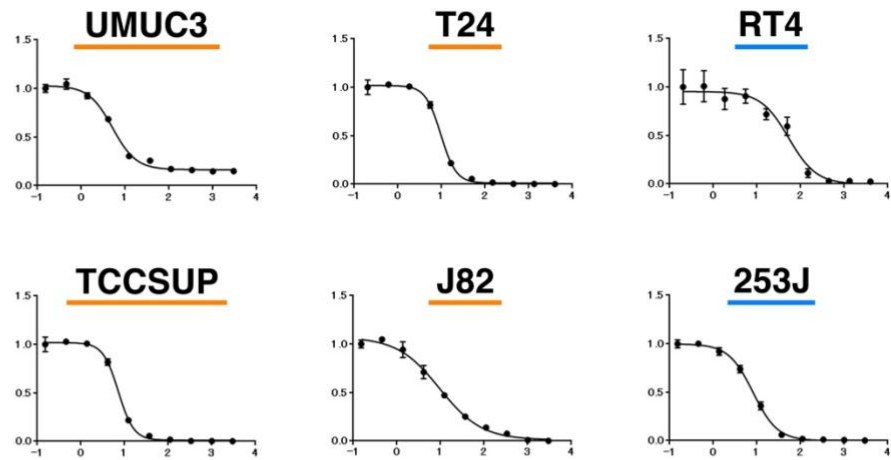

### MK-1775

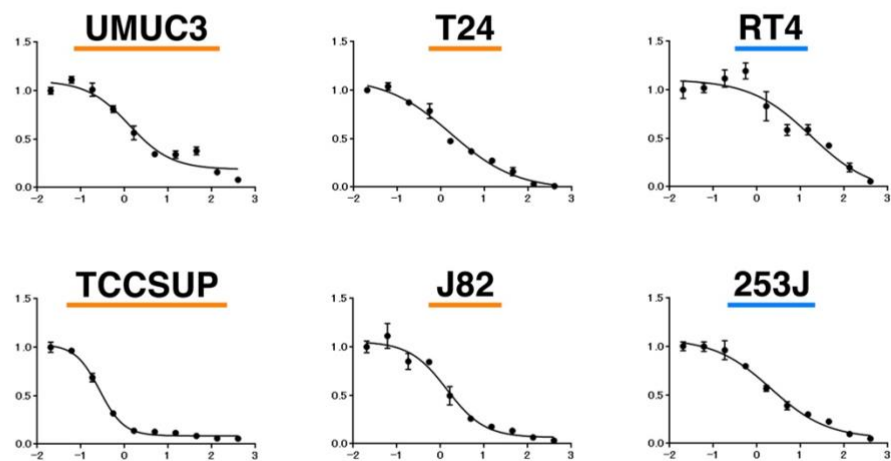

Dose-effect curves for CDDP (upper panels) and MK-1775 (lower panels) in the indicated UC cell lines. Estimated IC<sub>50</sub> values from these analyses are shown in Figs. 1E and 1F. The vertical axes indicate the proliferation rate normalized by that of vehicle-treated cells, while the horizontal axes indicate the drug concentration in log scale.

## Supplementary Figure S3

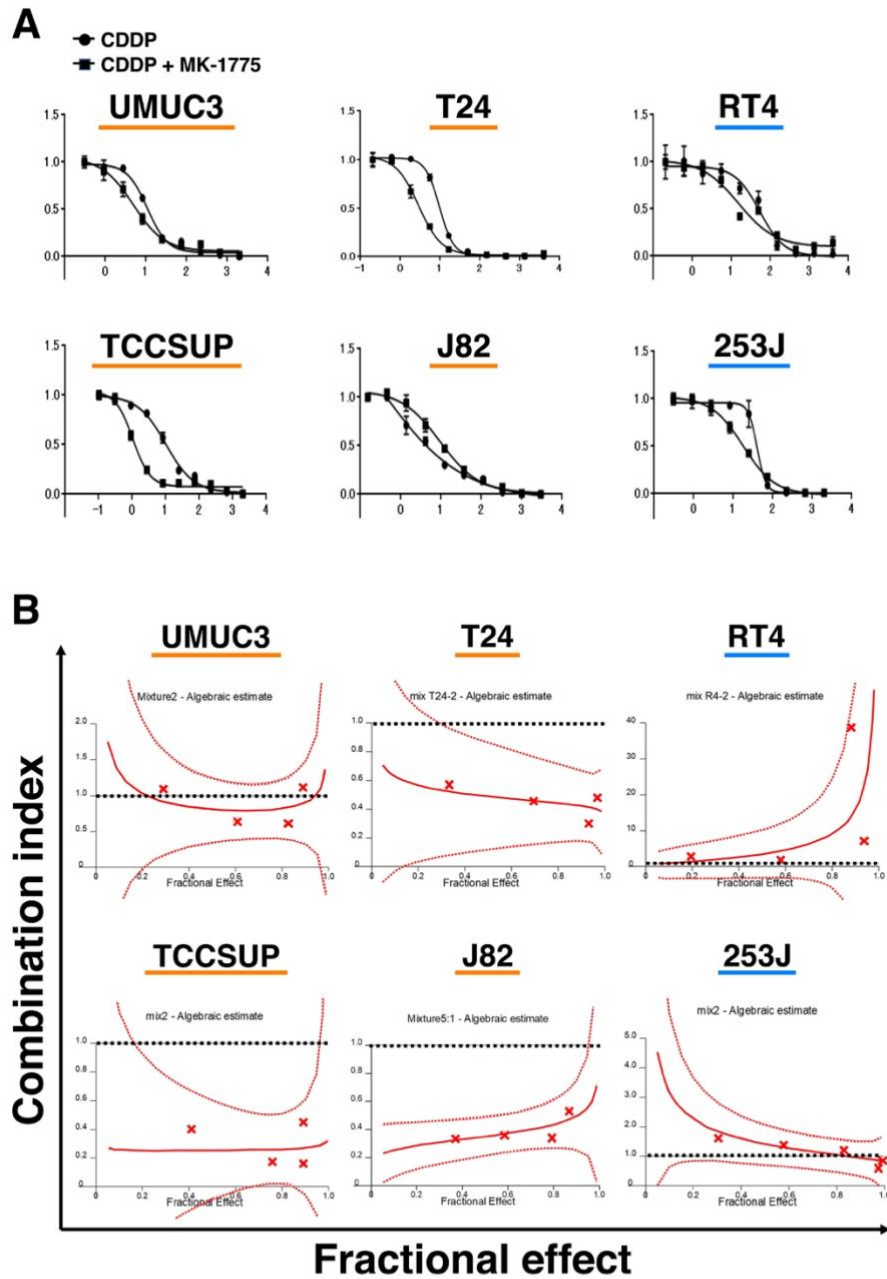

**A.** Dose-effect curves for CDDP in the presence (circle) and absence (square) of MK-1775 in the indicated UC cell lines. The vertical axes indicate the proliferation rate normalized by that of vehicle-treated cells, while the horizontal axes indicate the drug concentration in log scale. **B.** Combination indices for the combination treatment of CDDP plus MK-1775 in the indicated human UC cells were plotted (red crosses) using CalcuSyn software. A combination index  $<1$  (dotted line) denotes a synergistic effect. MK-1775 with CDDP shows a synergistic effect in TP53-mutant cell lines (orange lines) but not in TP53-wild-type cells (blue lines). The results are summarized in Fig. 1G.

# Supplementary Figure S4

## TP53 mutant

## TP53 wild-type

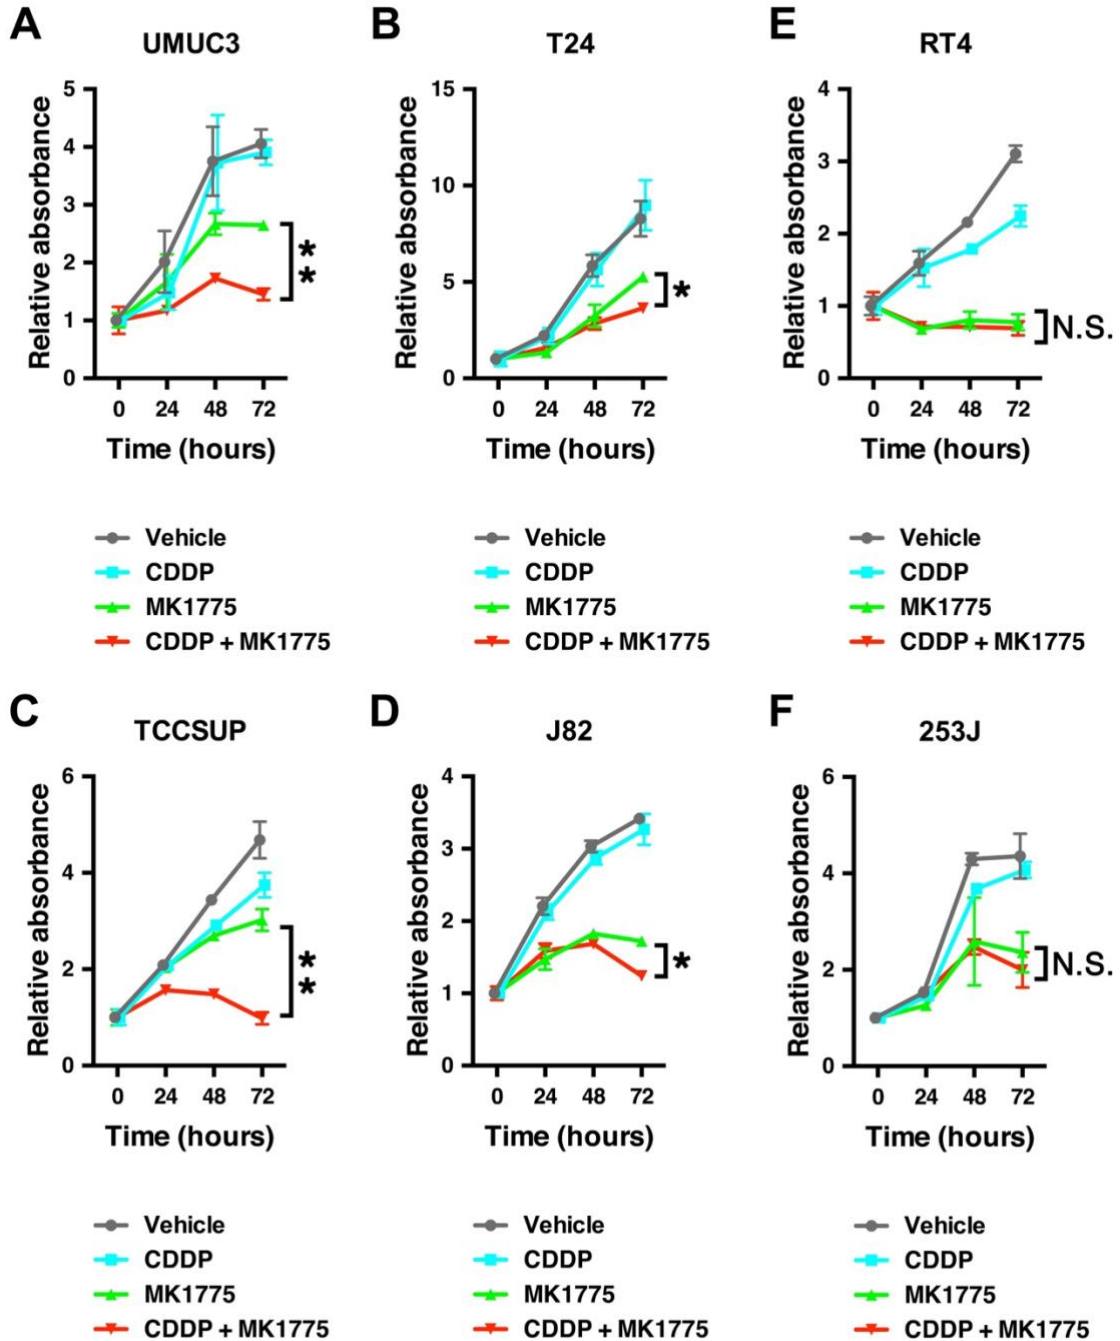

Proliferation curves of human UC cells treated with CDDP and MK-1775. Indicated cells were treated with vehicle (DMSO), CDDP, MK-1775, or CDDP plus MK-1775. Cell proliferation rate was evaluated by WST-8 assays at the indicated time in triplicate. \* $p < 0.05$ , \*\* $p < 0.01$ . The results are summarized in Fig. 2A.

**Supplementary Figure S5**

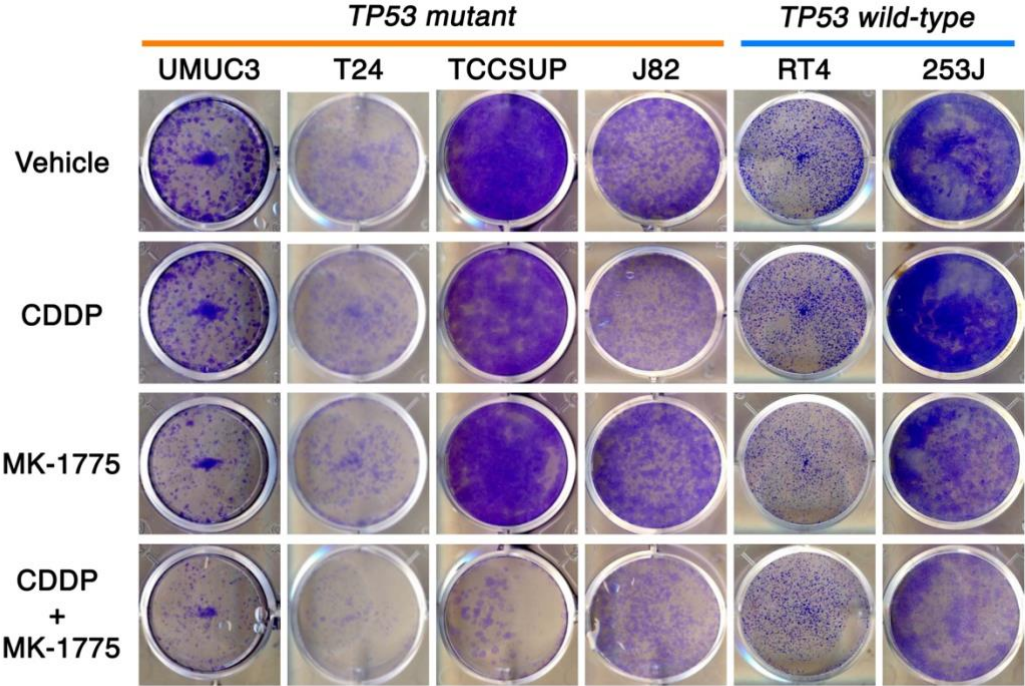

Proliferation ability of human UC cells treated with CDDP and/or MK-1775 was evaluated using colony-forming assays. Indicated cells were treated with vehicle (DMSO), CDDP, MK-1775, or CDDP plus MK-1775. Cells were fixed and stained with crystal violet after 72 h of treatment in triplicate. The results are quantitated and summarized in Fig. 2B.

### Supplementary Figure S6

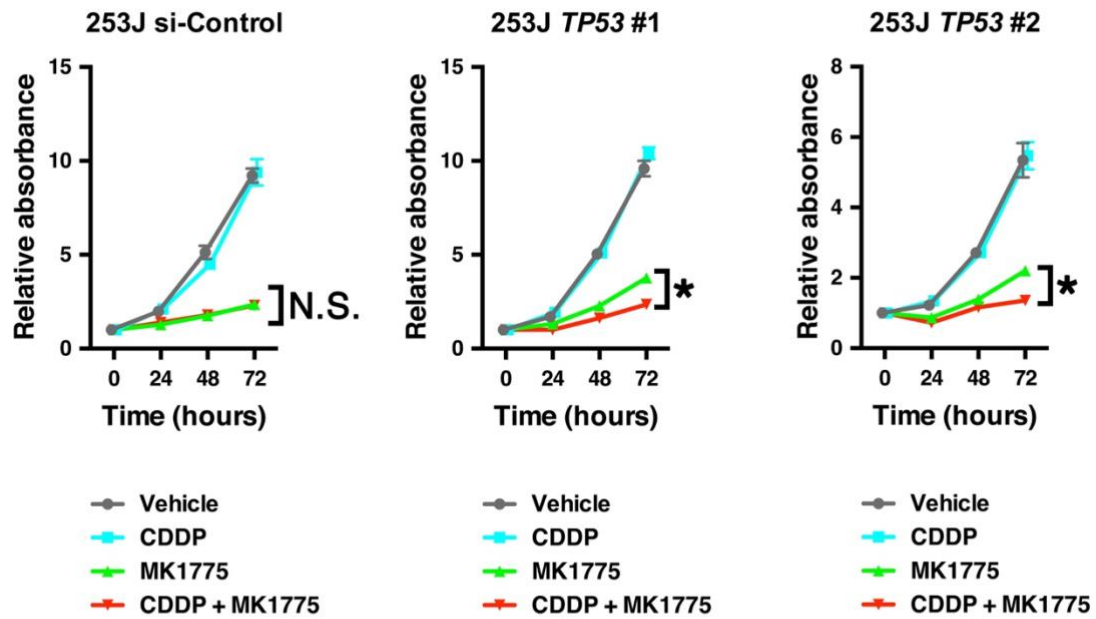

Proliferation curves of 253J cells treated with the indicated siRNA in the absence or presence of CDDP and MK-1775 alone or in combination. Cell proliferation rate was evaluated by WST-8 assays at the indicated time in triplicate \* $p < 0.05$ . The results are summarized in Fig. 2F.

Supplementary Figure S7

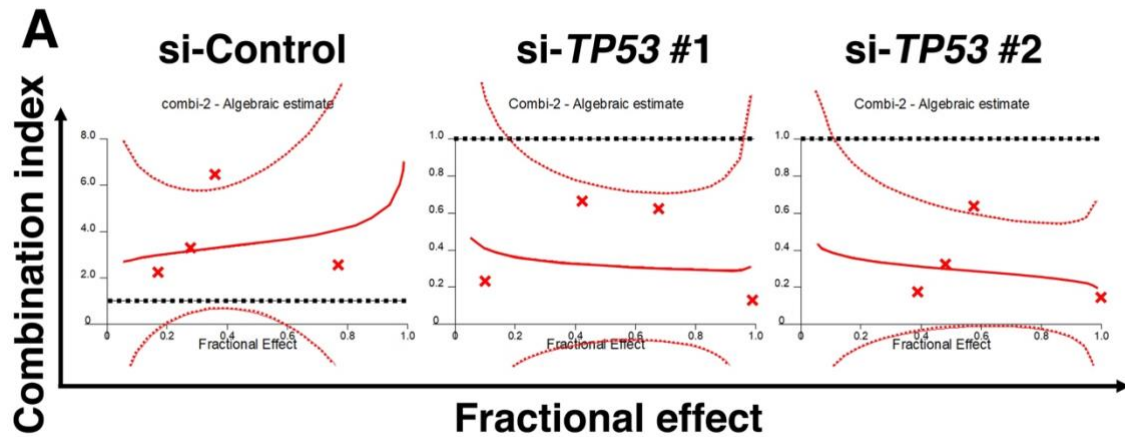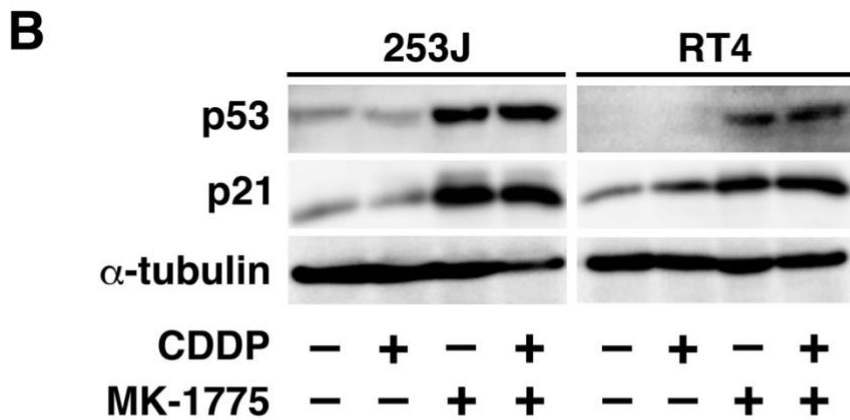

**A.** Combination indices for the combination treatment of CDDP plus MK-1775 in 253J cells treated with the indicated siRNA were plotted (red crosses) using CalcuSyn software. A combination index <1 (dotted line) denotes a synergistic effect. MK-1775 combined with CDDP showed a synergistic effect in cells transfected with siRNAs for TP53 but not in cells transfected with control siRNA. The results are summarized in Fig. 2G. **B.** 253J and RT4 cells were treated as indicated and p53 and p21 expressions were analyzed by western blotting.  $\alpha$ -tubulin acts as loading control.

**Supplementary Figure S8**

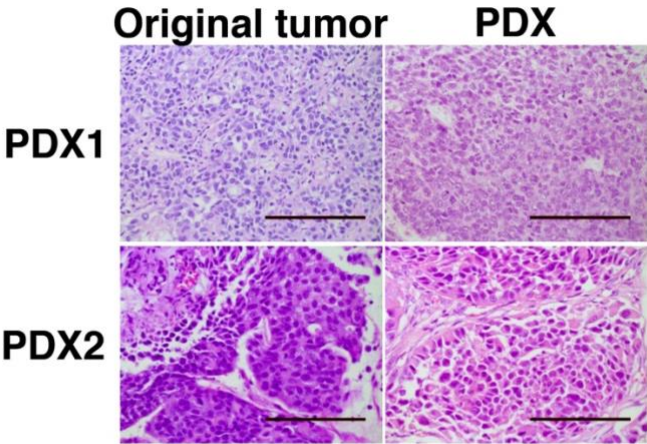

Representative images of H&E staining of original tumors and xenograft tumors for PDX1 and PDX2. Bars indicate 100  $\mu$ m.



## Supplementary Figure S9

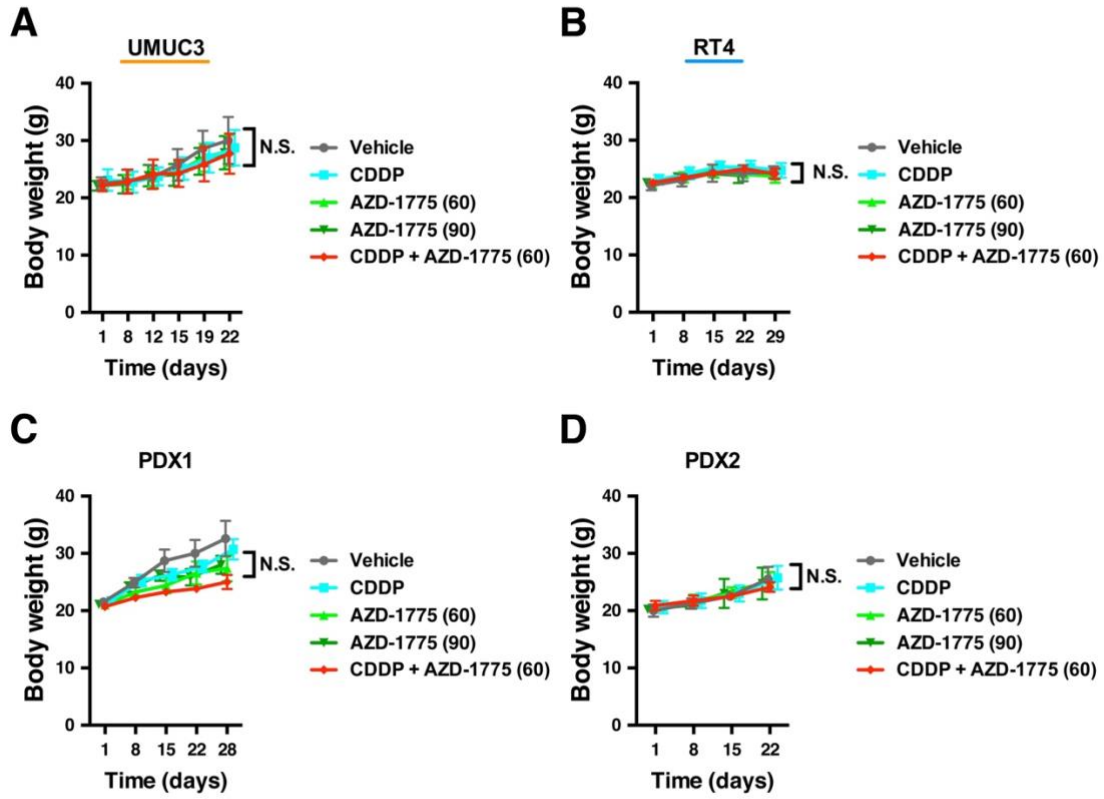

Charts for body weight changes in mice implanted with the UMUC3 cell-based xenograft (**A**), RT4 cell-based xenograft (**B**), PDX1 (**C**), and PDX2 (**D**) during the indicated treatment.

## Supplementary Figure S10

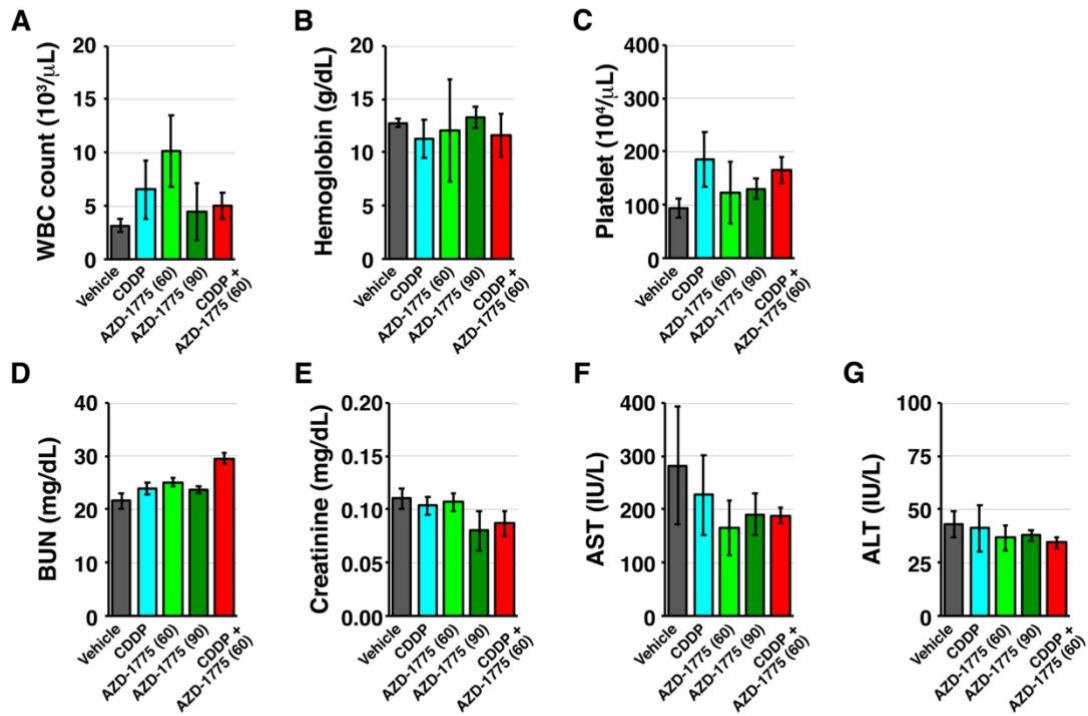

Charts for blood tests in mice administered with CDDP and AZD-1775 alone or in combination. Mice were treated as in Fig. 4A, and blood samples were collected at the end of the treatment. WBC, white blood cell; BUN, blood urea nitrogen; AST, aspartate aminotransferase; ALT, alanine aminotransferase.

## Supplementary Figure S11

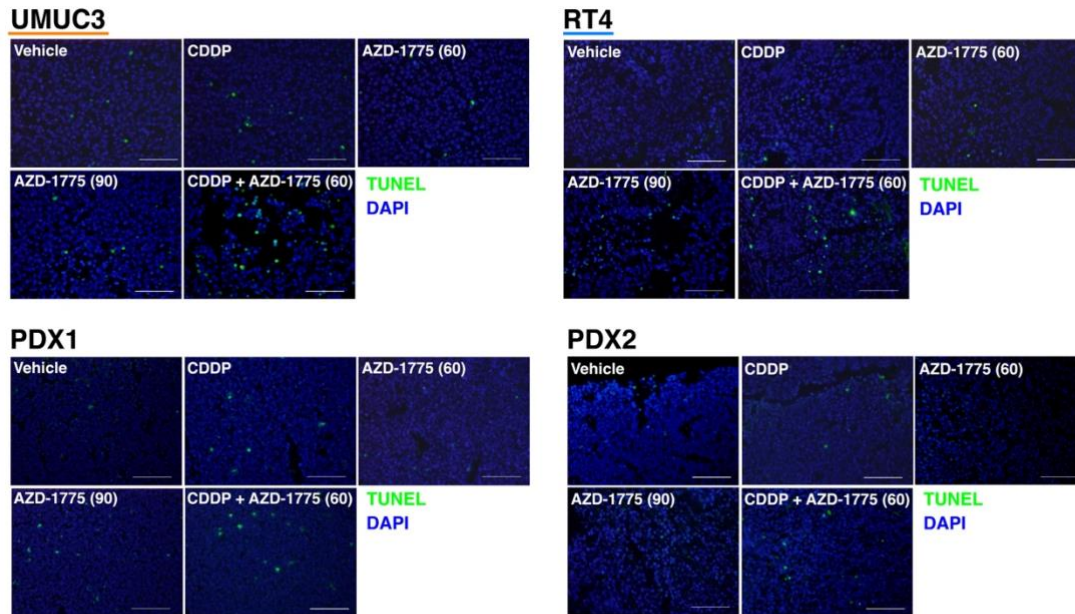

**A–D.** Representative fluorescent images of TUNEL assays in tumors after the 3-week treatment. CDX UMUC3 (**A**), CDX RT4 (**B**), PDX1 (**C**) and PDX2 (**D**) were treated as shown in Fig. 4A. Quantified results are summarized in Figs. 4B–E (right).
